# Supplementary material for: The novel, recurrent mutation in the TOP2A gene results in the enhanced topoisomerase activity and transcription deregulation in glioblastoma
Source: bioRxiv or medRxiv preprint supplement (doi:10.1101/2020.06.17.158477), 2021-02-26

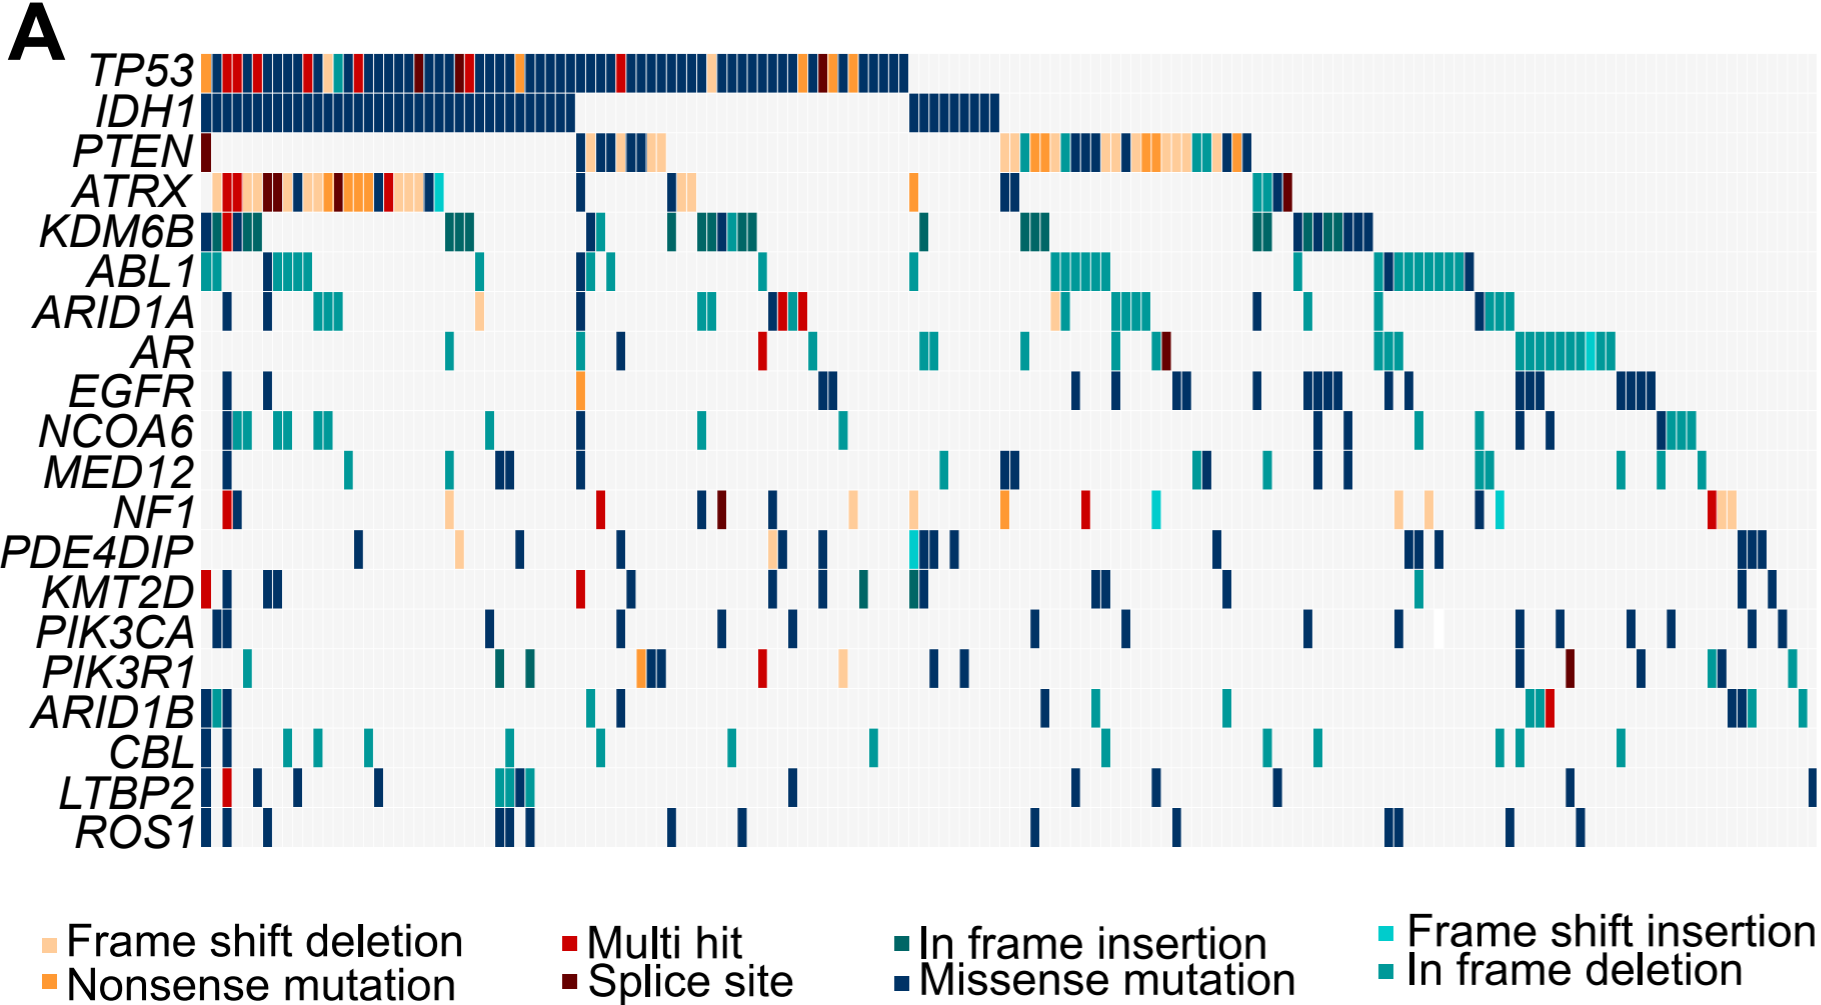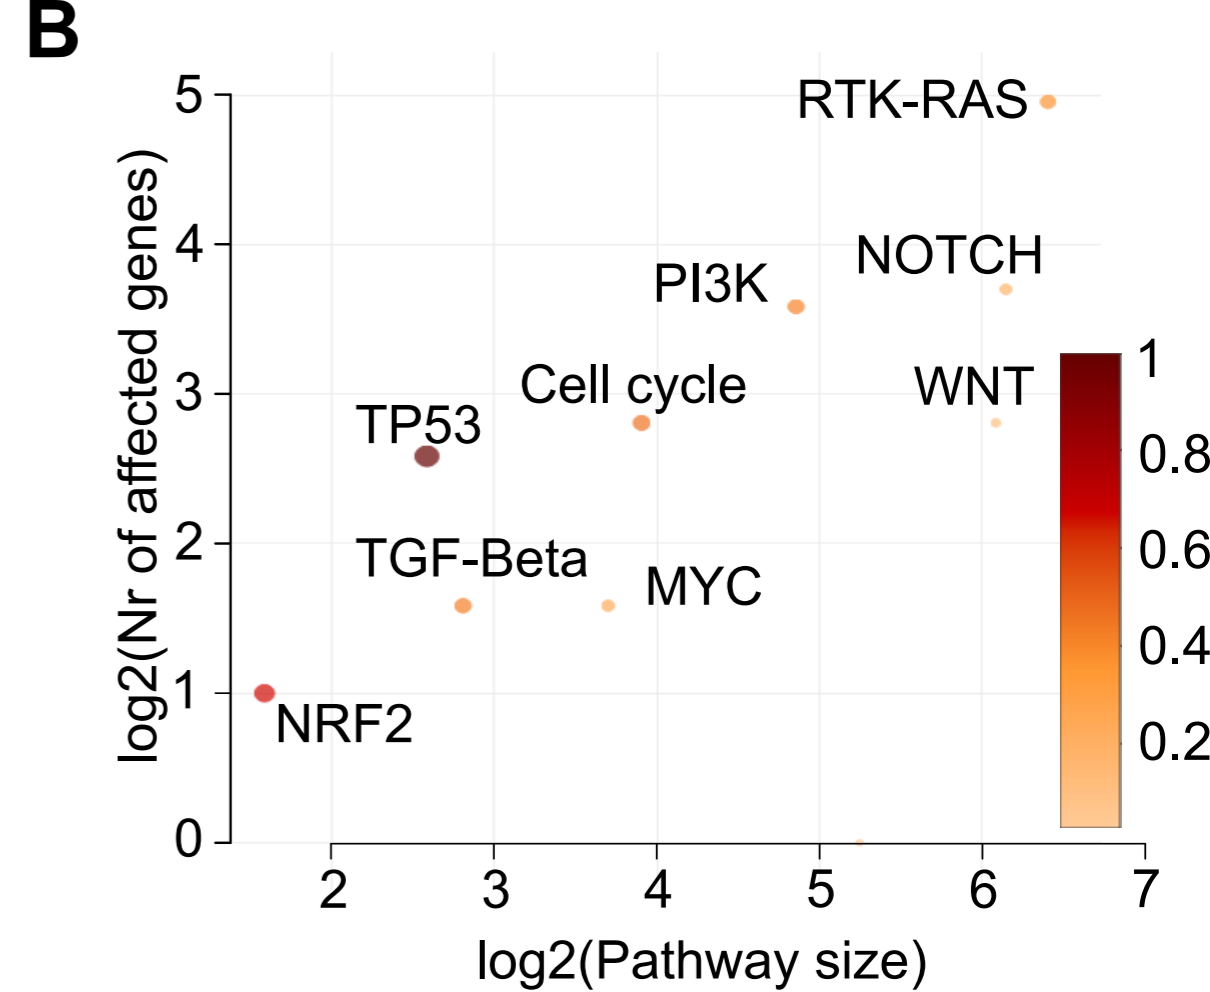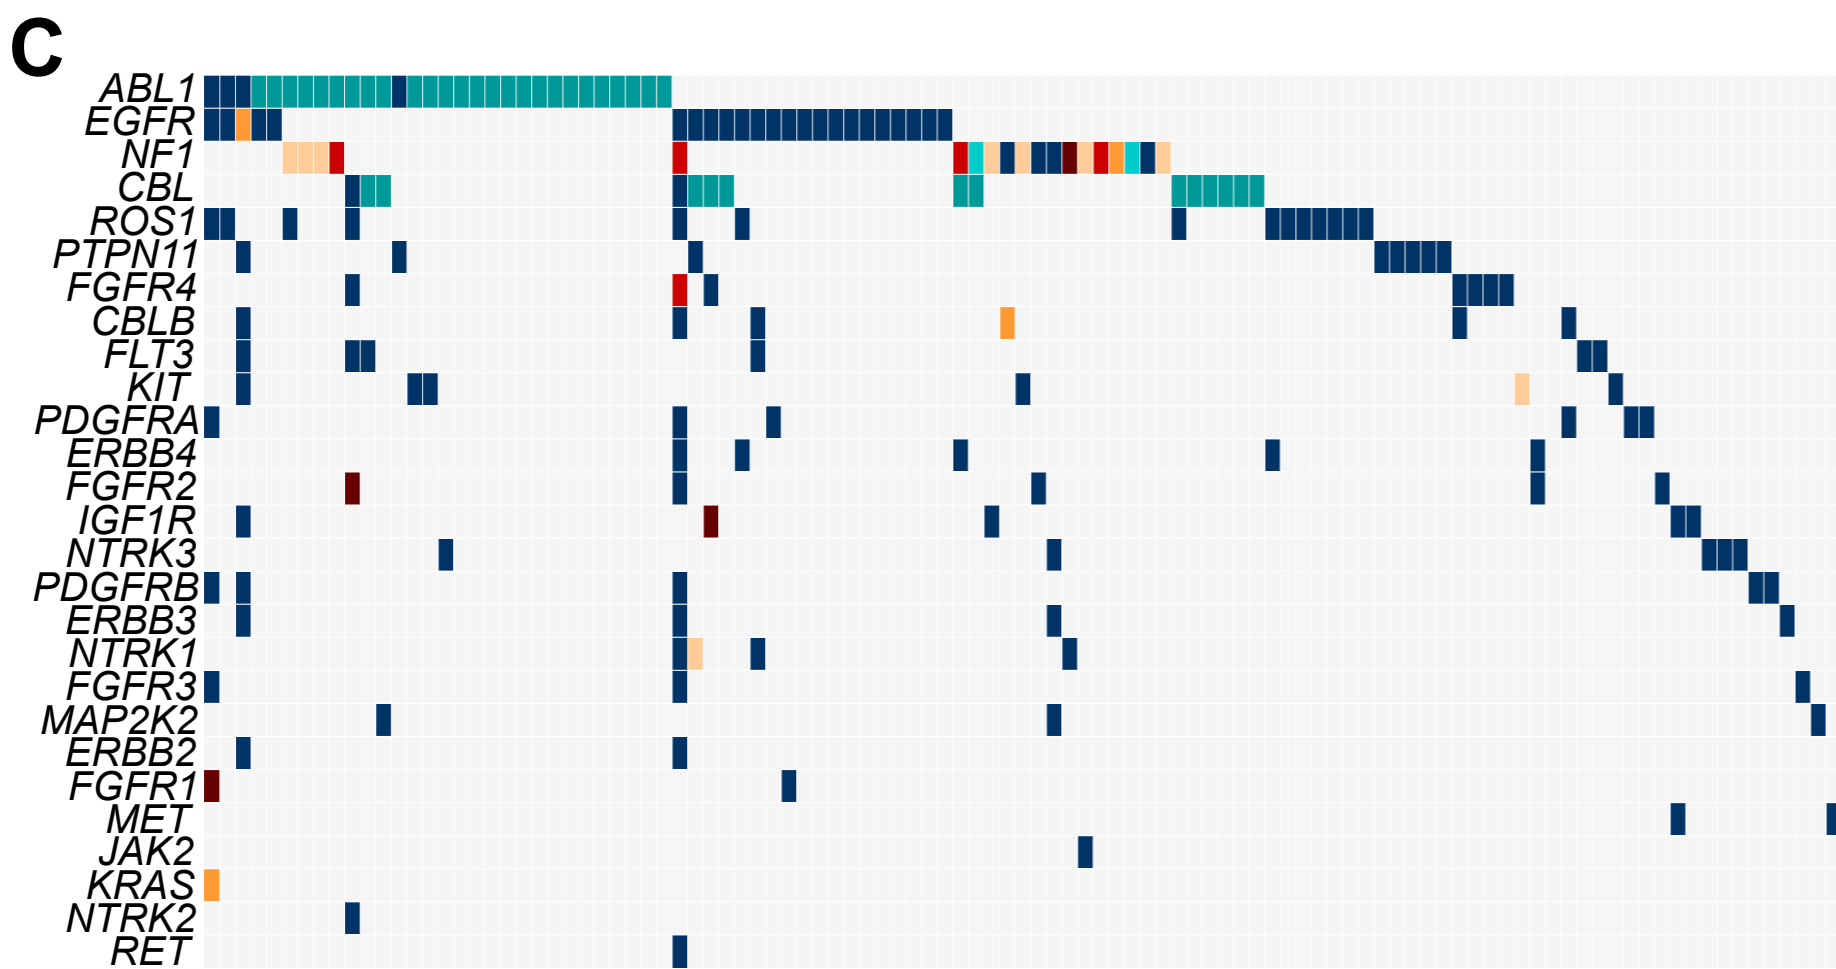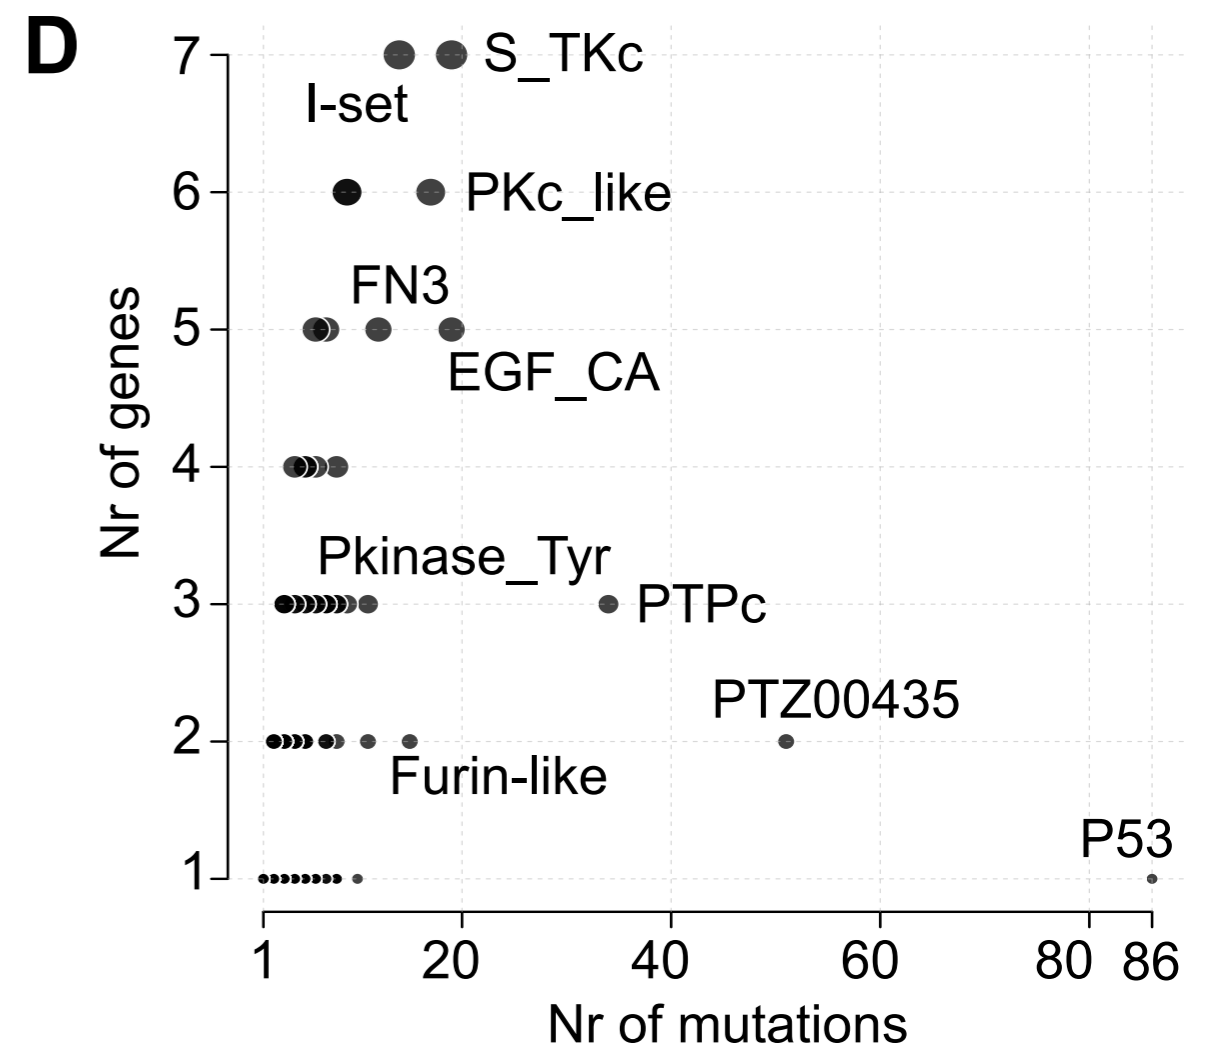

Supplement: Supplementary file [file media-2.pdf]
